# Supplementary material for: On–off–on fluorescent oligomer as a chemosensor for the detection of manganese(vii), sulfur(ii) and aldehydes based on the inner filter effect
Source: Royal Society of Chemistry journal article supplement (doi:10.1039/c6ra25583c), 2017-01-01
Supplement: c6ra25583c1.pdf [file c6ra25583c1.pdf]

## Supporting information

### On-Off-On Fluorescent Oligomer as a Chemosensor for the Detection of Manganese (VII), Sulfur (II) and Aldehydes Based on the Inner Filter Effect

Peng Ding, Xia Xin\*, Lingli Zhao, Zengchun Xie, Qinghong Zhang, Jianmei Jiao, Guiying Xu

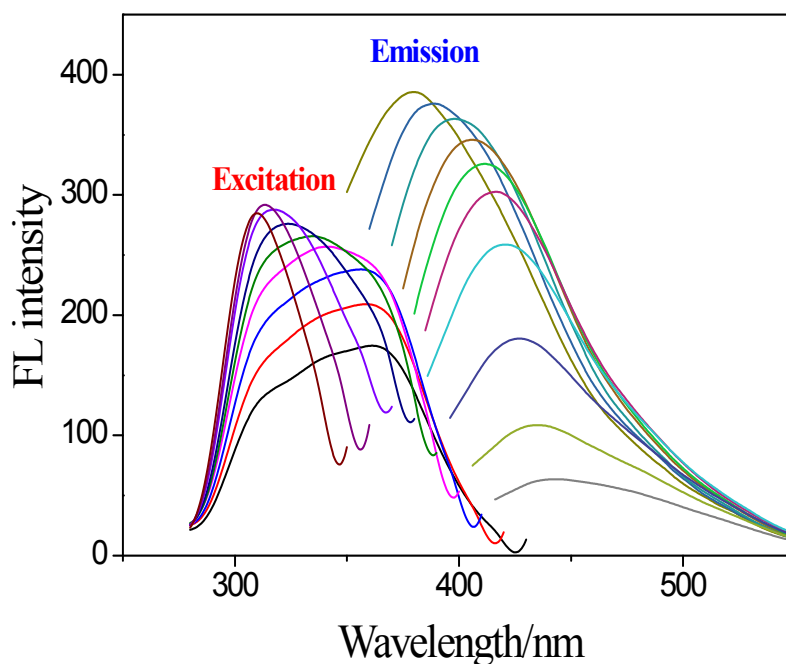

Figure S1 the different excitation and emission spectrum of Tyloxapol (3mM).

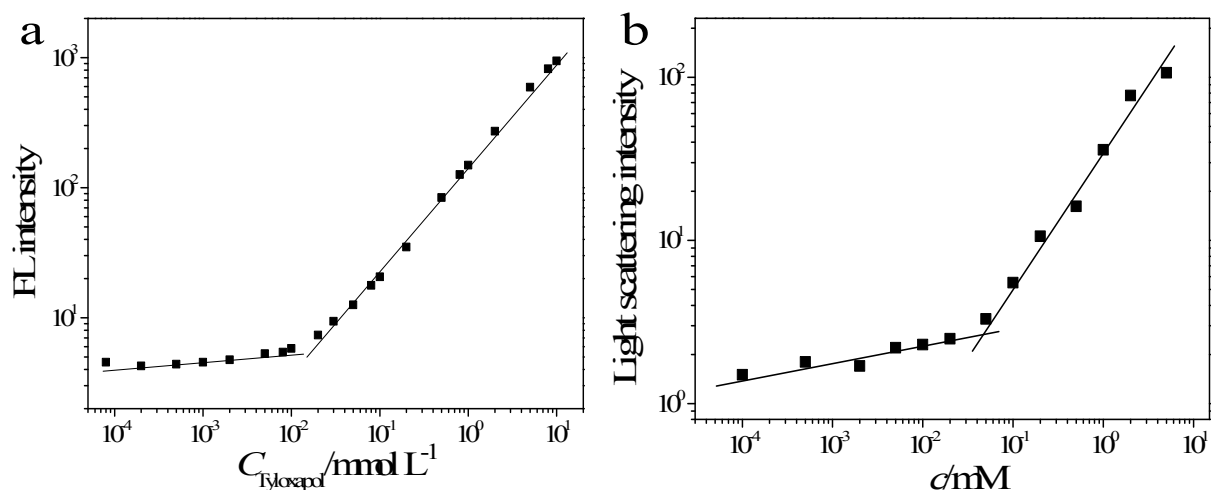

Figure S2 (a) The variation of the fluorescence intensity and (b) the light scattering intensities as a function of the concentration of Tyloxapol.

Figure S2

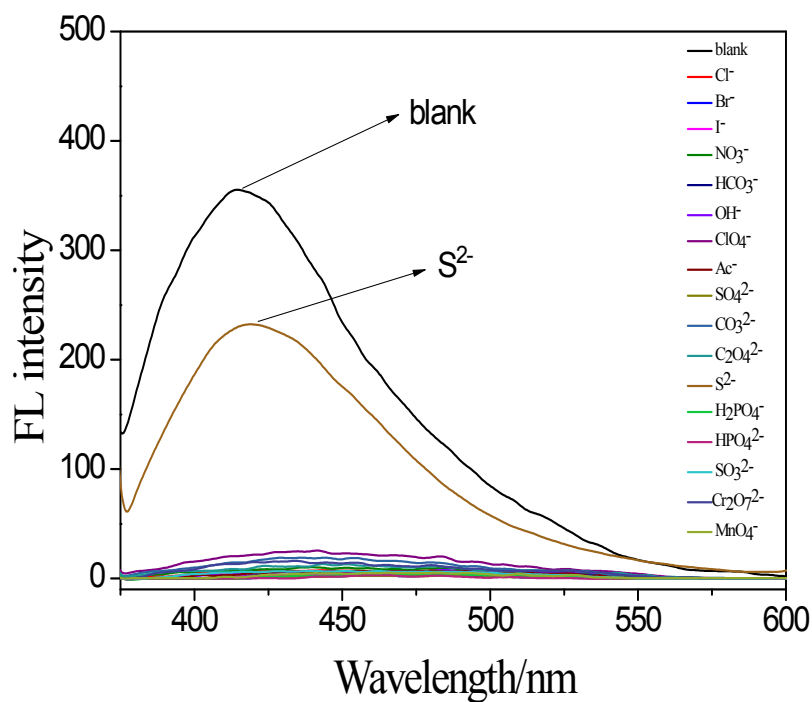

Figure S3 Fluorescence intensity of Tyloxapol(3 mM)/MnO<sub>4</sub><sup>-</sup>(200μM) with different anions(500μM)(Cl<sup>-</sup>, Br<sup>-</sup>, I<sup>-</sup>, NO<sub>3</sub><sup>-</sup>, H<sub>2</sub>PO<sub>4</sub><sup>-</sup>, HCO<sub>3</sub><sup>-</sup>, OH<sup>-</sup>, ClO<sub>4</sub><sup>-</sup>, Ac<sup>-</sup>, SO<sub>4</sub><sup>2-</sup>, HPO<sub>4</sub><sup>2-</sup>, CO<sub>3</sub><sup>2-</sup>, C<sub>2</sub>O<sub>4</sub><sup>2-</sup>, S<sup>2-</sup>, SO<sub>3</sub><sup>2-</sup>, Cr<sub>2</sub>O<sub>7</sub><sup>2-</sup>, MnO<sub>4</sub><sup>-</sup>).

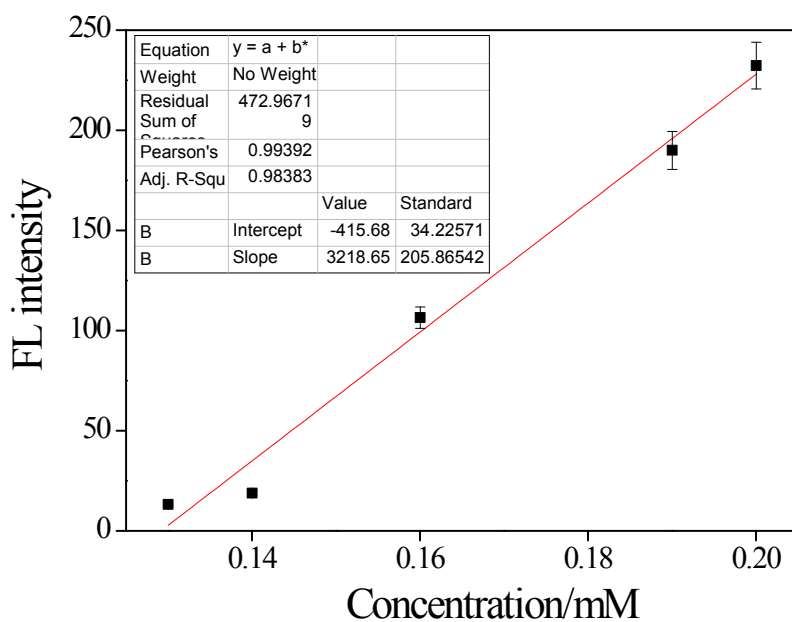

Figure S4 Fluorescence intensity of Tyloxapol(3 mM)/MnO<sub>4</sub><sup>-</sup>(200 μM) with different concentration of S<sup>2-</sup>.

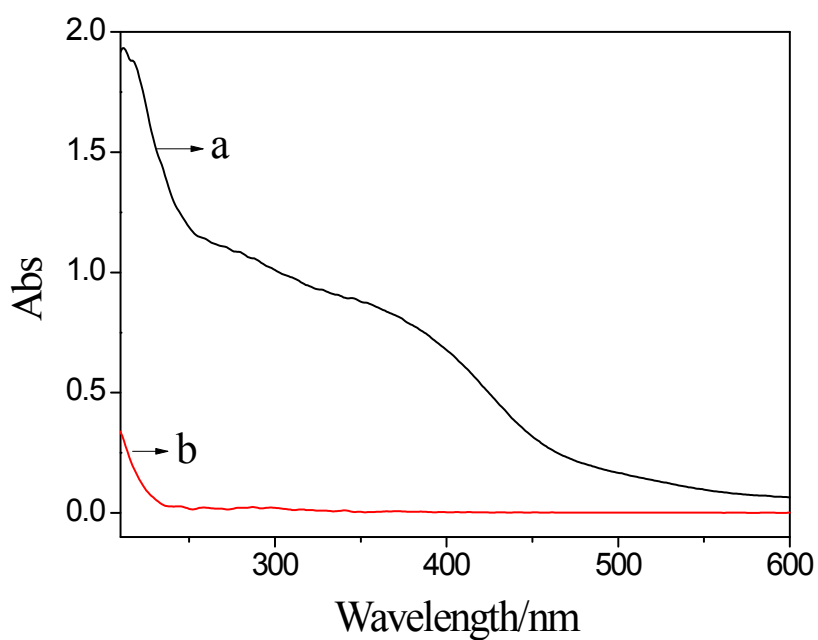

Figure S5 UV-vis absorption spectrum of 3 mmol L<sup>-1</sup> Tyloxapol/200 μmol L<sup>-1</sup> MnO<sub>4</sub><sup>-</sup>/500 μmol L<sup>-1</sup> S<sup>2-</sup> (a), 3 mmol L<sup>-1</sup> Tyloxapol/200 μmol L<sup>-1</sup> MnO<sub>4</sub><sup>-</sup>/4.4 mol L<sup>-1</sup> HCHO (b).

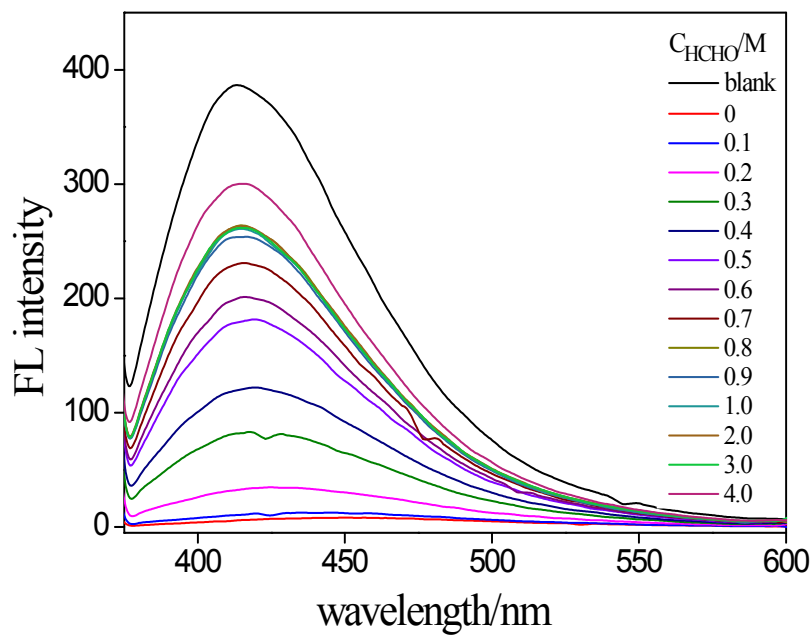

Figure S6 Fluorescence intensity of Tyloxapol(3 mM)/MnO<sub>4</sub><sup>-</sup>(200µM) with different concentration of HCHO.

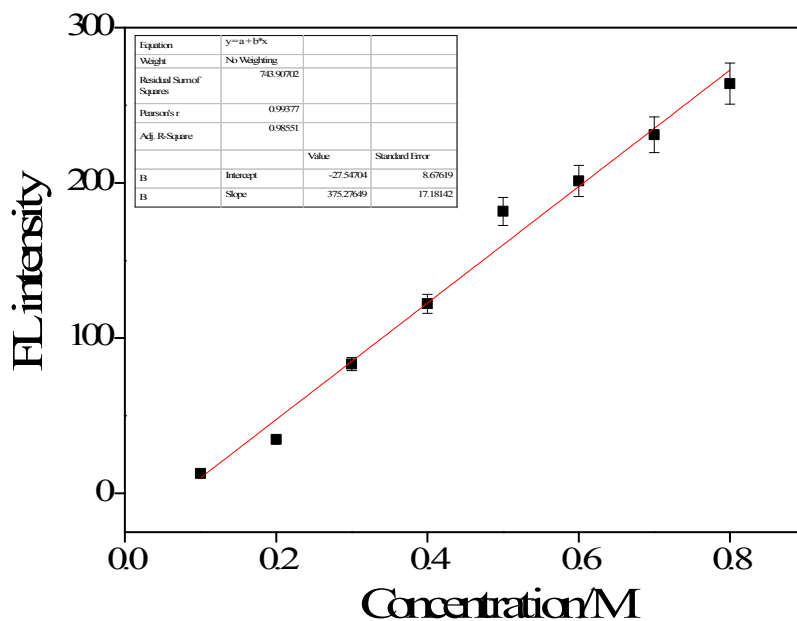

Figure S7 Fluorescence intensity of Tyloxapol(3 mM)/MnO<sub>4</sub><sup>-</sup>(200µM) with different concentration of HCHO.
